# Supplementary material for: Controllable growth of novel BiPO4 dendrites by an innovative approach and high energy facets-dependent photocatalytic activity
Source: Royal Society of Chemistry journal article supplement (doi:10.1039/c4ce00852a), 2014-01-01
Supplement: c4ce00852a1.pdf [file c4ce00852a1.pdf]

Supporting Information for

**Controllable growth of novel BiPO<sub>4</sub> dendrites by an innovative approach and  
high energy facets-dependent photocatalytic activity**

Qiuying Zhang, Hao Tian, Na Li, Mindong Chen, Fei Teng\*

*Jiangsu Engineering Technology Research Centre of Environmental Cleaning  
Materials, Jiangsu Key Laboratory of Atmospheric Environment Monitoring and  
Pollution Control, School of Environmental Sciences and Engineering, Nanjing  
University of Information Sciences and Engineering, Nanjing 210044, P. R. China*

---

\* Corresponding author. Tel./Fax: 0086-25-5873-1090; Email: tfwd@163.com

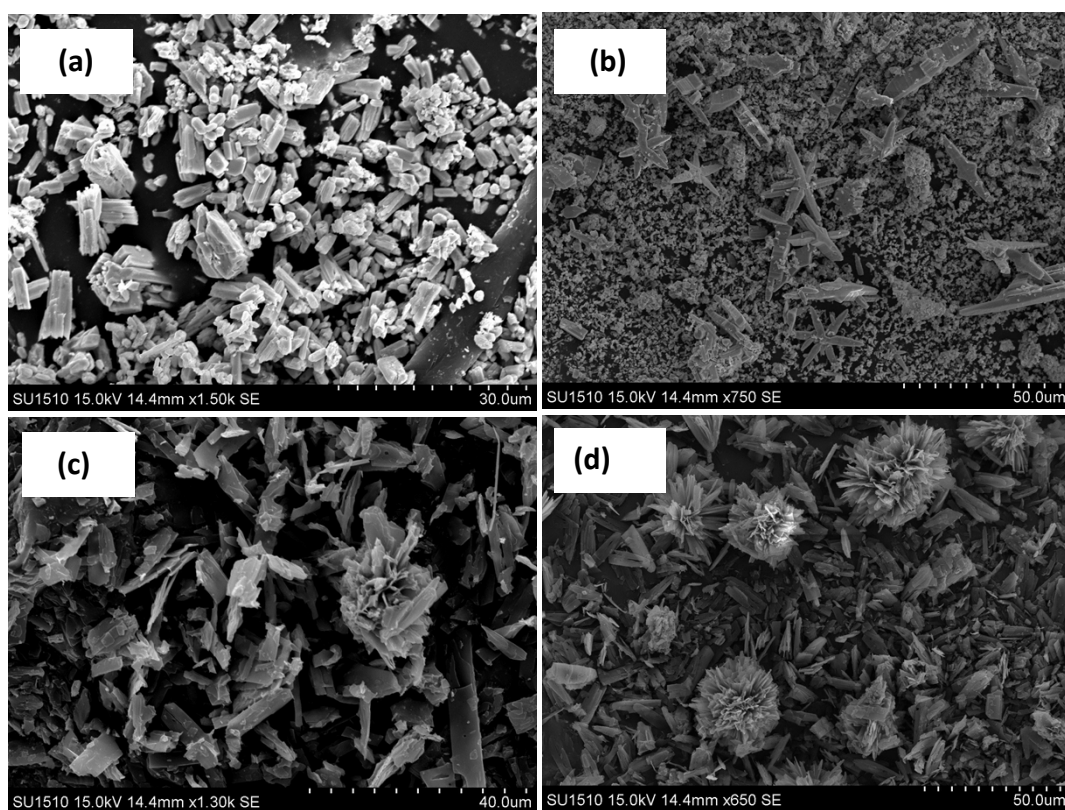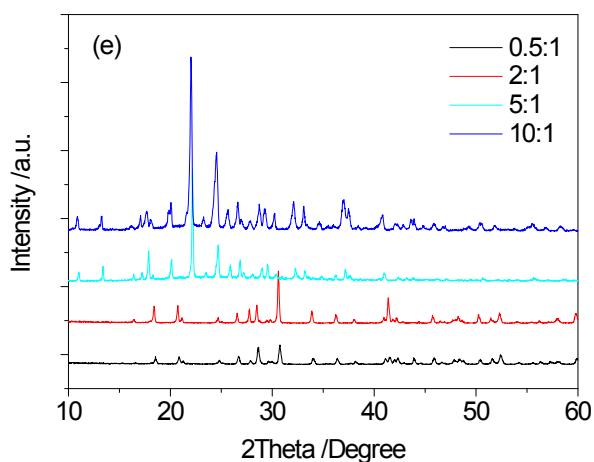

**Figure S1** Effect of EDTA/Bi(III) molar ratio on the samples: (a) 0.5/1; (b) 2/1; (c) 5/1; (d) 10/1; (e) XRD

According to JCPDS 15-0767, it is obvious that  $\text{BiPO}_4$  irregular polyhedrons and six-branch dendrites with more nanoparticles form at 0.5/1 and 2/1 (EDTA/Bi), respectively; but both samples have low XRD peaks intensities. At 5/1 and 10/1, EDTA samples, instead of  $\text{BiPO}_4$  are acquired, which is attributed to the more and strong complexing effect of EDTA. It is noted that at high ratios (2/1, 5/1, 10/1), EDTA can not completely dissolve in the solution at room temperature. At too much

amounts of EDTA, Bi(III) ions can be released but are still remained in solution under our experiments. But EDTA has precipitated out through a dissolution – recrystallization process.

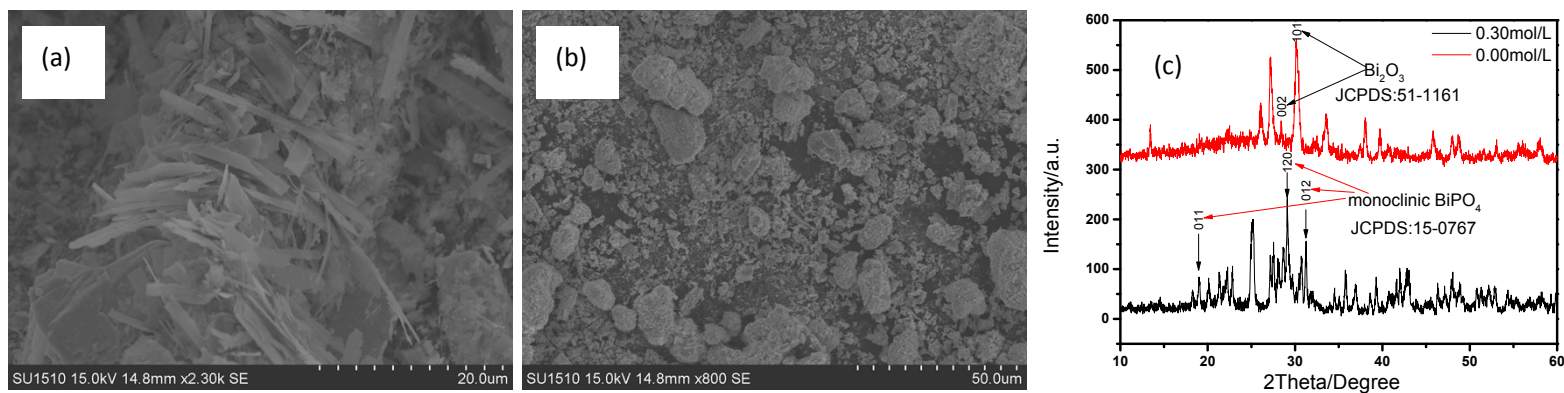

**Figure S2** SEM images and XRD patterns of the samples prepared at different concentrations of hydrogen ions: (a) 0 mol/L; (b) 0.30 mol/L; (c) XRD

At 0.30 mol/L hydrogen ion (pH = 0.52), the as-prepared samples are NOT phase-pure  $\text{BiPO}_4$ , but with many unknown impurities phases. Therefore the concentrations of hydrogen ion are controlled in the range of 0.05 to 0.2 mole/L (pH=0.699~1.0), so as to obtain the phase-pure  $\text{BiPO}_4$  sample. With further increasing pH value to or higher than 7,  $\text{Bi}_2\text{O}_3$  form.

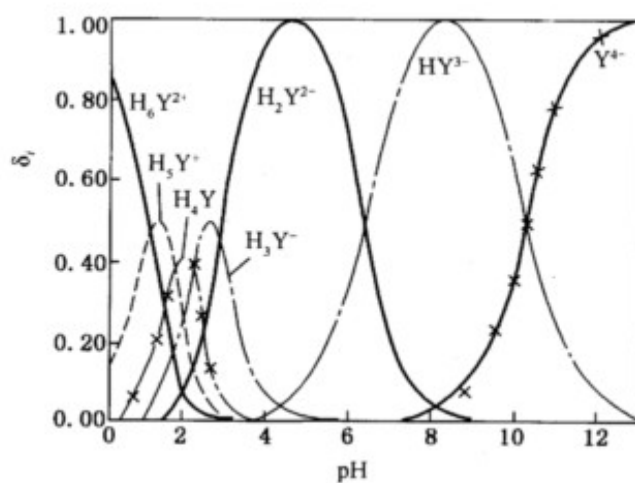

**Figure S3** Distribution diagram of various existing forms of EDTA at different pH values (“Analytical Chemistry” (5<sup>th</sup> Edition), Wuhan University, Beijing, Higher Education Press, 2006.)

It is obvious that EDTA has seven existing forms at different pH values. At pH values low than 1.3, **EDTA** mainly exists as the three forms of  $H_6Y^{2+}$ ,  $H_5Y^+$  and  $H_4Y$  (Y=EDTA)

(a)

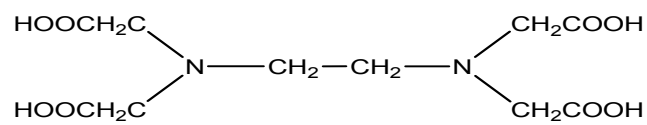

(b)

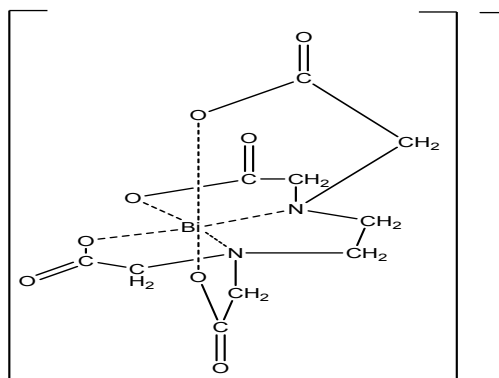

**Figure 4** The chemical formula of EDTA (a) and Bi (III)-EDTA complex (b): EDTA, ethylene diamine tetraacetic acid

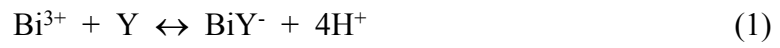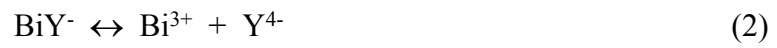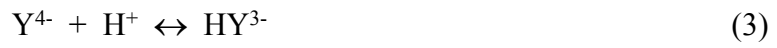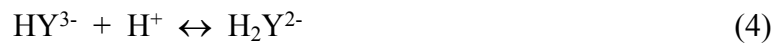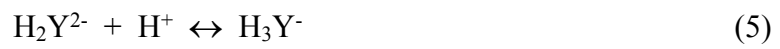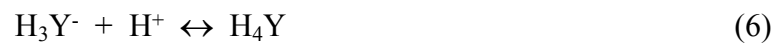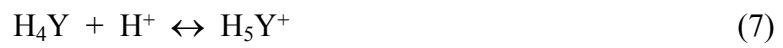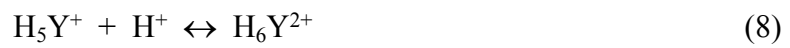

**Equation S1** The chemical equations in the presence of both  $\text{H}^{+}$  and  $\text{Bi}^{3+}$ : (Y=EDTA)

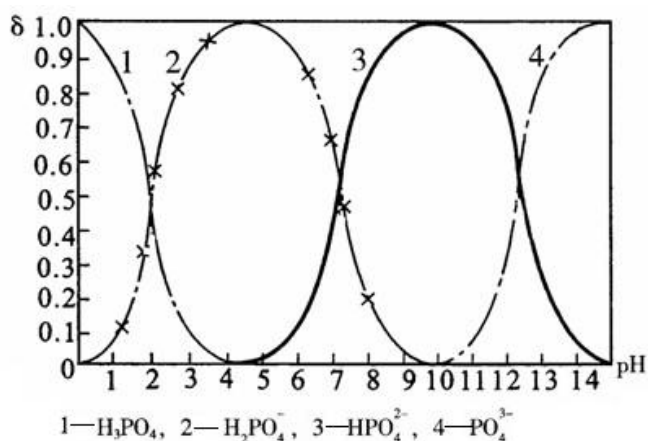

**Figure S5** Distribution diagram of various existing forms of  $\text{H}_3\text{PO}_4$  at different pH values (“Analytical Chemistry” (5<sup>th</sup> Edition), Wuhan University, Beijing, Higher Education Press, 2006.)

It is obvious that  $\text{H}_3\text{PO}_4$  has four existing forms at different pH values. At pH values low than 2,  $\text{H}_3\text{PO}_4$  mainly exists as the two forms of  $\text{H}_3\text{PO}_4$  and  $\text{H}_2\text{PO}_4^-$ . Under hydrothermal conditions,  $\text{PO}_4^{3-}$  is released, and the  $\text{H}^+$  released by  $\text{H}_3\text{PO}_4$  and  $\text{H}_2\text{PO}_4^-$  will combine with  $(\text{edta}^-)_4$  become  $\text{H}_6\text{Y}^{2+}$ . Since our experiments are mainly done under acidic conditions, phosphorous source mainly exists as the molecular form of  $\text{H}_3\text{PO}_4$ . After the Bi(III) ions are released from EDTA-Bi(III) complex, the hydrogen ions in  $\text{H}_3\text{PO}_4$  can be released to produce  $\text{PO}_4^{3-}$  ions, resulting in the formation of  $\text{BiPO}_4$ .



**Table S1** Equilibrium constants of EDTA and H<sub>3</sub>PO<sub>4</sub>

| Chemicals                      | Equilibrium constants                                                                                              |
|--------------------------------|--------------------------------------------------------------------------------------------------------------------|
| EDTA                           | $K_{a1}=1.0\times 10^{-2}$ , $K_{a2}=2.1\times 10^{-3}$ , $K_{a3}=6.9\times 10^{-7}$ , $K_{a4}=5.9\times 10^{-11}$ |
| H <sub>3</sub> PO <sub>4</sub> | $K_{a1}=6.7\times 10^{-3}$ , $K_{a2}=6.2\times 10^{-8}$ , $K_{a3}=4.5\times 10^{-13}$                              |
| EDTA-Bi(III)<br>complex        | $K_s=27.94$                                                                                                        |
| BiPO <sub>4</sub>              | $K_{sp}=1.26\times 10^{-23}$                                                                                       |

Phosphorus source mainly exists as the form of H<sub>3</sub>PO<sub>4</sub> and EDTA mainly exists as the molecular form, as shown in Figure S2.

(“*Analytical Chemistry*” (5<sup>th</sup> Edition), Wuhan University, Beijing, Higher Education Press, 2006.)

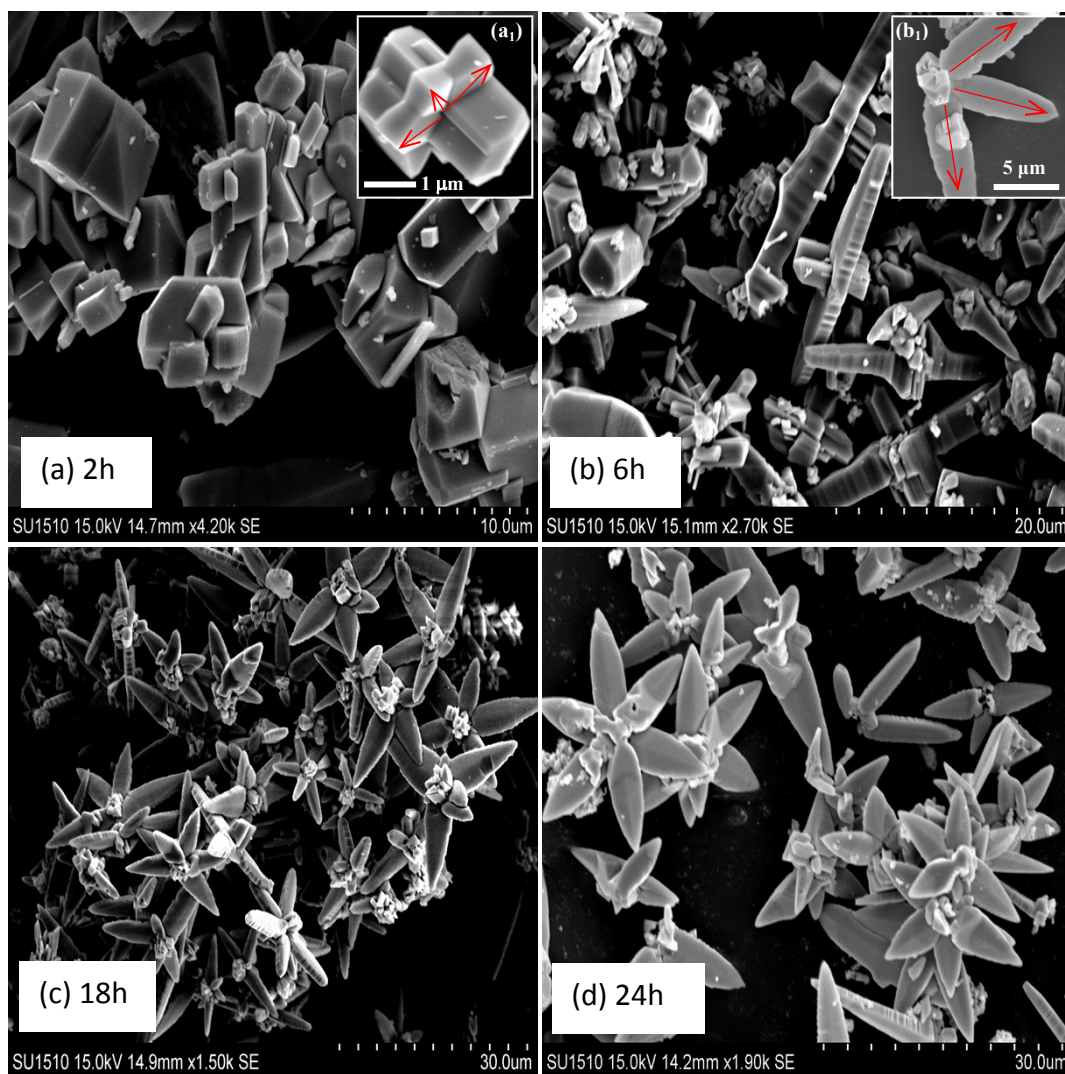

**Figure S6** The time-dependent experiments for the six-branch  $\text{BiPO}_4$  dendrites: (a-d) SEM; (e) XRD; using EDTA instead of  $\text{EDTA-Na}_2$ ,  $\text{pH}=1.0$

At the initial time the polyhedrons have formed, and then they transform into the six-branch dendrites through the dissolution and recrystallization processes. The details mechanism is still unknown at the present time

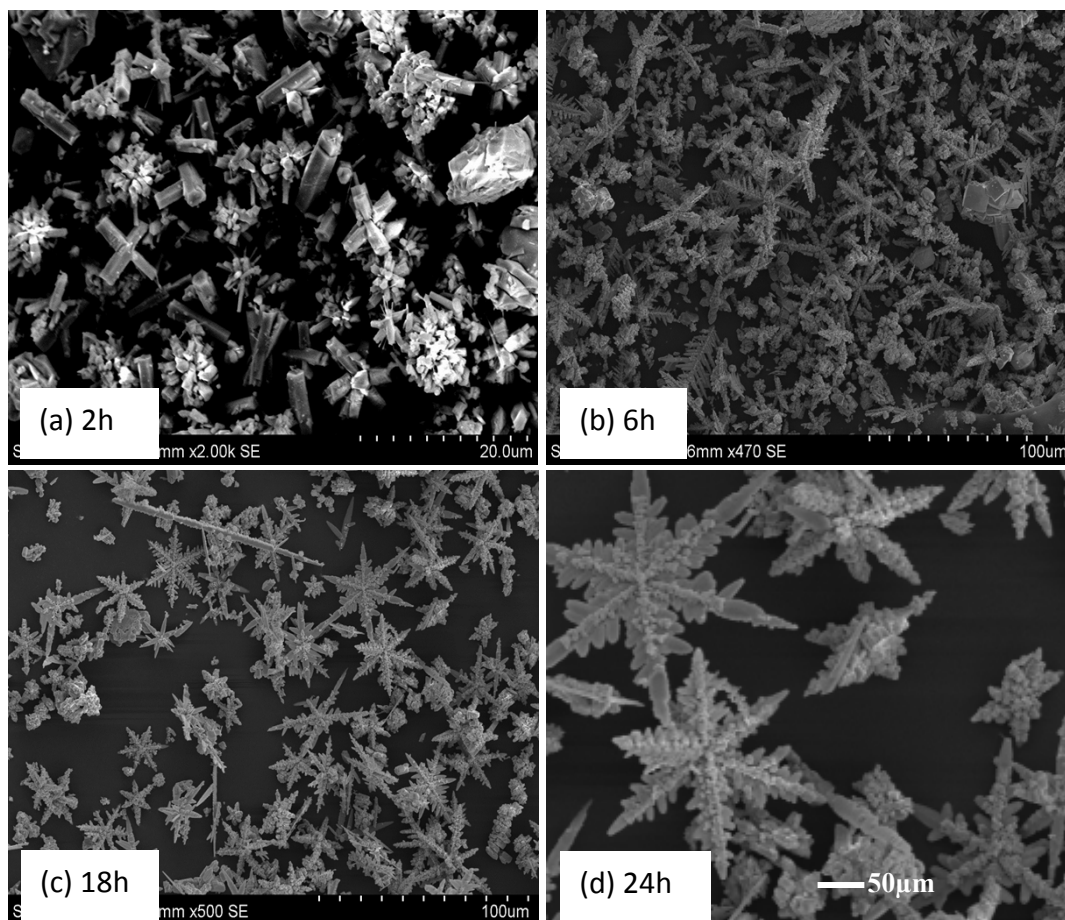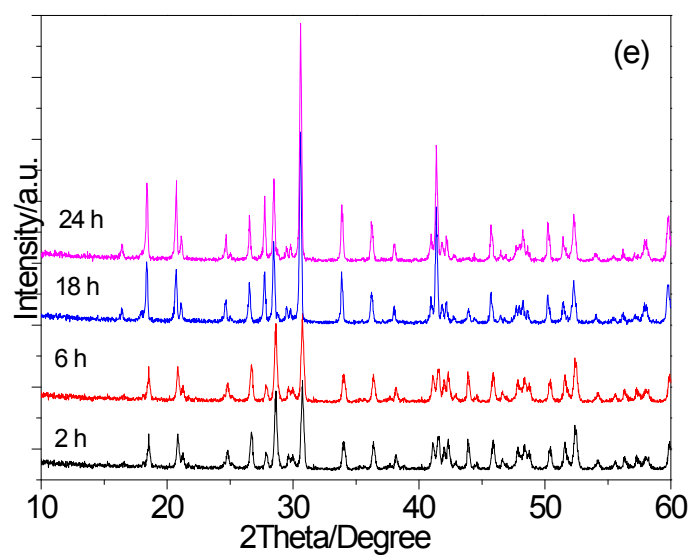

**Figure S7** The time-dependent experiments for the snowflake-like  $\text{BiPO}_4$  dendrites: (a-d) SEM; (e) XRD; using EDTA and adding 275  $\mu\text{L}$  of 65wt.%  $\text{HNO}_3$ ;  $\text{pH} = 0.699$  ( $[\text{H}^+] = 0.2\text{mol/L}$ )

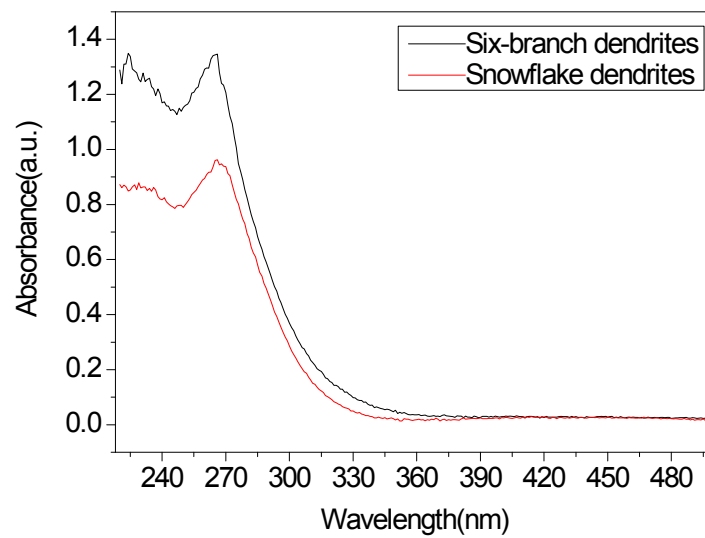

**Figure S8** UV-vis diffuse reflection spectra (UV-DRS) of the snowflake dendrites and six-branch dendrites

**Table S2** The crystal phases, particle sizes and texture properties of the BiPO<sub>4</sub> samples

| Samples                                                         | Six-branch dendrites | Snowflake dendrites | Cubes       |
|-----------------------------------------------------------------|----------------------|---------------------|-------------|
| <sup>1</sup> Particle size                                      | 30 μm × 30 μm        | 40 μm × 40 μm       | 10 μm×10 μm |
| <sup>2</sup> S <sub>BET</sub> (m <sup>2</sup> g <sup>-1</sup> ) | 6.5                  | 3.2                 | 7.9         |
| <sup>3</sup> Pore volume (cm <sup>3</sup> g <sup>-1</sup> )     | 0.010                | 0.009               | 0.008       |
| <sup>3</sup> Pore size (nm)                                     | 3.40                 | 3.10                | 3.06        |

<sup>1</sup>Particle size, observed from SEM images; <sup>2</sup>S<sub>BET</sub>, calculated by the Brunauer-Emmett-Teller (BET) method; <sup>3</sup>Pore volume and size, calculated by the Barrett-Joyner-Halenda (BJH) method.

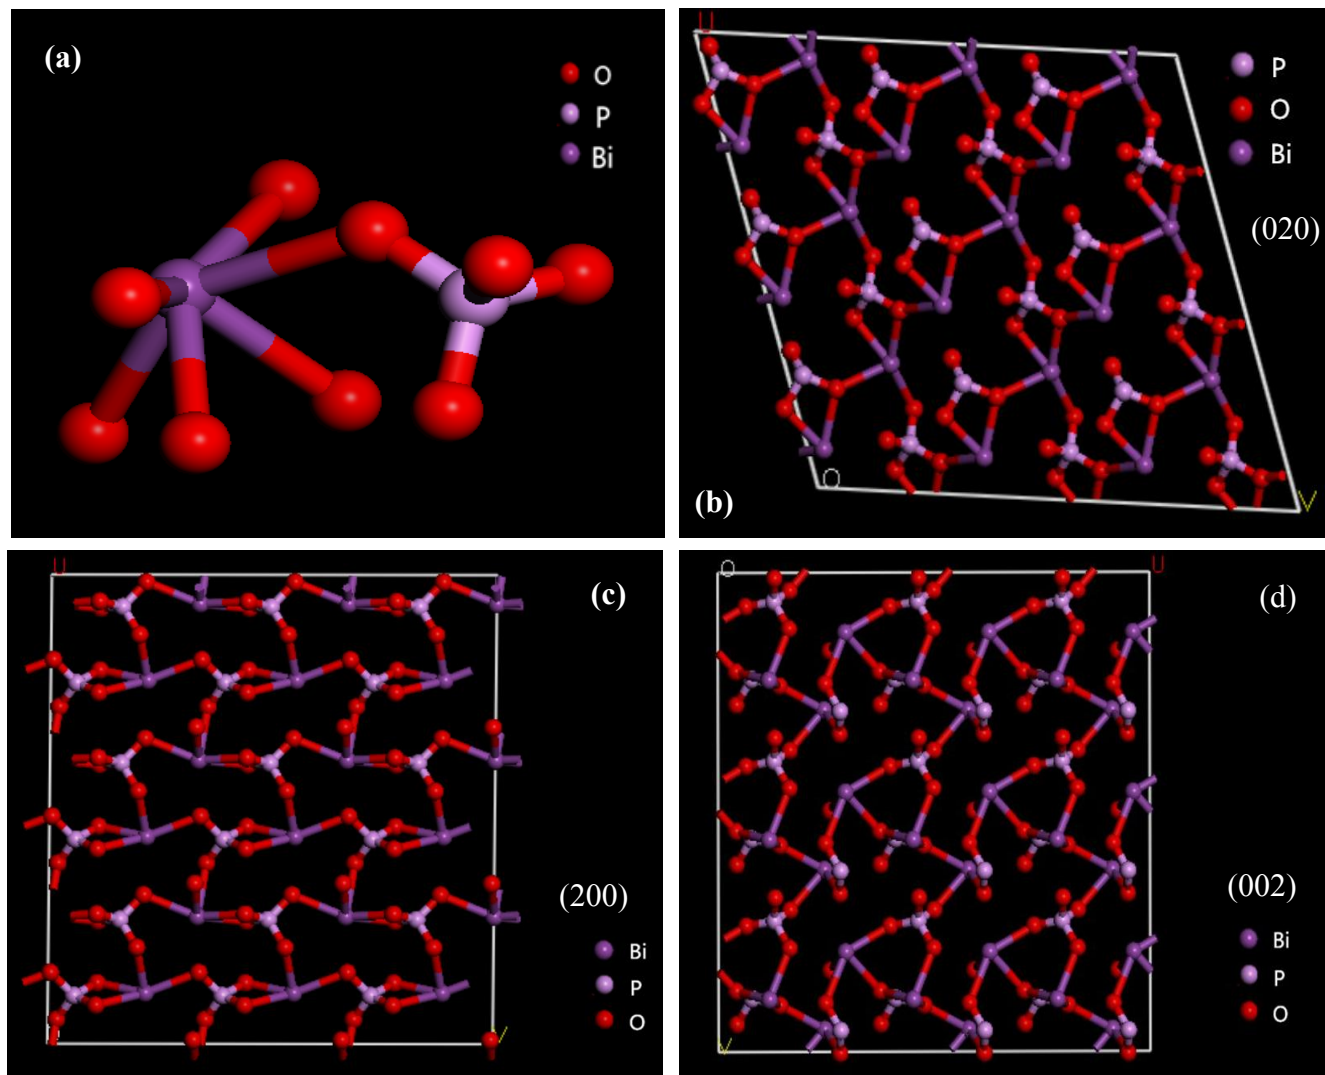

**Figure S9** Molecular unit model (a) and atomic configurations of (020), (200) and (002) facets (b-d) of monoclinic  $\text{BiPO}_4$
